# Supplementary material for: Survival outcomes after omission of surgery for ductal carcinoma in situ
Source: PubMed Central journal article supplement — NPJ Breast Cancer. 2024 Sep 20;10:82. doi: 10.1038/s41523-024-00689-5 (PMC11415377; doi:10.1038/s41523-024-00689-5), 2024-09-20
Supplement: 41523_2024_689_MOESM1_ESM.pdf [file 41523_2024_689_MOESM1_ESM.pdf]

**Supplementary Table 1: Stepwise study cohort selection criteria for patients with biologically favorable DCIS**

| <b>Parameter</b>                                                        | <b>No. of Subjects</b> |
|-------------------------------------------------------------------------|------------------------|
| Start: DCIS diagnosed between 2004-2017                                 | 339,600                |
| Exclude Male                                                            | 337,873                |
| Exclude if histology not 8500, 8501, 8010, 8050, 8522, 8504, 8201, 8230 | 207,305                |
| Exclude if surgery = unknown                                            | 200,731                |
| Exclude patients younger than 40 or older than 99                       | 195,464                |
| Exclude patients with high grade                                        | 88,306                 |
| Exclude patients with ER and PR negative                                | 74,868                 |
| Exclude patients with unknown duration between surgery and diagnosis    | 74,367                 |

**Supplementary Table 2:** Demographics of the Biologically Favorable DCIS Cohort

| Variable                          | Surgery       | Active Surveillance | p-value* |
|-----------------------------------|---------------|---------------------|----------|
| <b>Patients</b>                   | 71983 (96.8%) | 2384 (3.2%)         |          |
| <b>Age (mean ± SD)</b>            | 59.8 ± 11.3   | 62.2 ± 13.3         | <0.01    |
| <b>Year of Diagnosis</b>          |               |                     |          |
| 2004-2009                         | 21397 (29.7%) | 654 (27.4%)         |          |
| 2010-2013                         | 23975 (33.3%) | 739 (31.0%)         |          |
| 2014-2017                         | 26611 (37.0%) | 991 (41.6%)         |          |
| <b>Race</b>                       |               |                     | <0.01    |
| White                             | 58067 (81.5%) | 1683 (72.9%)        |          |
| Black                             | 9075 (12.7%)  | 456 (19.8%)         |          |
| Other                             | 4140 (5.8%)   | 168 (7.3%)          |          |
| Unknown                           | 701           | 77                  |          |
| <b>Insurance Status</b>           |               |                     | <0.01    |
| Private                           | 43038 (60.5%) | 1192 (51.6%)        |          |
| Medicaid                          | 3275 (4.6%)   | 112 (4.9%)          |          |
| Medicare                          | 23033 (32.4%) | 904 (39.2%)         |          |
| Other Government                  | 756 (1.1%)    | 34 (1.5%)           |          |
| Not Insured                       | 1011 (1.4%)   | 67 (2.9%)           |          |
| <b>Facility Type</b>              |               |                     | <0.01    |
| Academic                          | 20044(27.8%)  | 768 (32.2%)         |          |
| Community Cancer                  | 18035 (25.1%) | 595 (25.0%)         |          |
| Comprehensive Community Program   | 33904 (47.1%) | 1021 (42.8%)        |          |
| <b>Facility Location</b>          |               |                     | <0.01    |
| Northeast                         | 16245 (22.6%) | 521 (21.9%)         |          |
| South                             | 26073 (36.2%) | 1076 (45.1%)        |          |
| Midwest                           | 19425 (27.0%) | 465 (19.5%)         |          |
| West                              | 10240 (14.2%) | 322 (13.5%)         |          |
| <b>Charlson Comorbidity Index</b> |               |                     | <0.01    |
| 0                                 | 61910 (86.0%) | 2190 (92.0%)        |          |
| 1                                 | 8206 (11.4%)  | 138 (5.8%)          |          |
| 2                                 | 1403 (2.0%)   | 36 (1.5%)           |          |
| 3+                                | 464 (0.6%)    | 20 (0.8%)           |          |
| <b>Tumor Size</b>                 |               |                     | <0.01    |
| <1 cm                             | 25013 (34.8%) | 446 (18.7%)         |          |
| 1-<2 cm                           | 10320 (14.3%) | 164 (6.9%)          |          |
| 2-<3 cm                           | 3651 (5.1%)   | 71 (3.0%)           |          |
| 3-<4 cm                           | 1377 (1.9%)   | 37 (1.6%)           |          |
| 4-<5 cm                           | 890 (1.2%)    | 21 (0.9%)           |          |
| ≥ 5 cm                            | 1450 (2.0%)   | 69 (2.9%)           |          |
| Unknown                           | 29282 (40.7%) | 1576 (66.1%)        |          |

|                          |               |              |       |
|--------------------------|---------------|--------------|-------|
| <b>Endocrine Therapy</b> |               |              | <0.01 |
| Yes                      | 34599 (48.1%) | 307 (12.9%)  |       |
| No                       | 33233 (46.2%) | 1822 (76.4%) |       |
| Unknown                  | 4151 (5.7%)   | 255 (10.7%)  |       |

\* P values were determined using Wilcoxon rank-sum tests for continuous variables and chi-square tests or Fisher's exact tests for categorical variables.

**Supplementary Table 3:** Endocrine therapy rates among AS patients by age

| Age                         | Endocrine Therapy Use* |             |             |
|-----------------------------|------------------------|-------------|-------------|
|                             | Yes (%)                | No (%)      | Unknown (%) |
| <b>&lt;50 years (n=493)</b> | 35 (7.1%)              | 391 (79.3%) | 67 (13.6%)  |
| <b>50-64 years (n=882)</b>  | 94 (10.7%)             | 690 (78.2%) | 98 (11.1%)  |
| <b>Age &gt;=65 (n=1009)</b> | 178 (17.6%)            | 741 (73.4%) | 90 (8.9%)   |
| <b>Total (2384)</b>         | 307                    | 1822        | 255         |

\*P value < 0.01 for association between endocrine therapy use and age based on chi-square test.

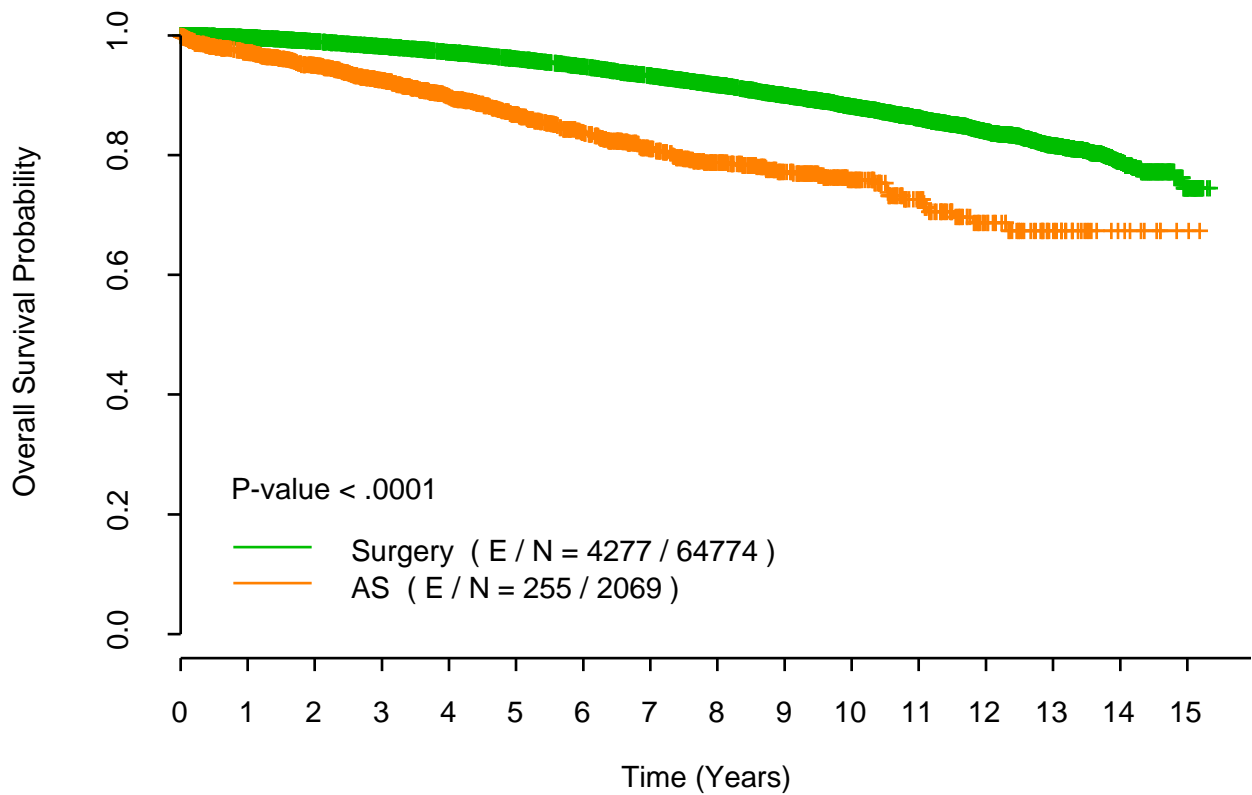

**Supplementary Figure 1** Kaplan Meier Survival Curves of Immediate Surgery vs Active Surveillance (AS) for the entire cohort of patients with Biologically Favorable DCIS Cohort. A log-rank test was employed to compare survival curves between two groups.
